# Supplementary material for: Copper Resistance Mechanism and Copper Response Genes in Corynebacterium crenatum
Source: MDPI journal article supplement (doi:10.3390/microorganisms12050951), 2024-05-08
Supplement: s1 [file s1]

**Table S1.** Strains and plasmids in this study.

| Strains or plasmids      | characteristics/purposes                                                                                              | Source                                        |
|--------------------------|-----------------------------------------------------------------------------------------------------------------------|-----------------------------------------------|
| Plasmids                 |                                                                                                                       |                                               |
| pK18mobsacB              | Mobilizable vector, allows for selection of double crossover in <i>C. crenatum</i> , Km <sup>R</sup> , <i>sacB</i>    | Biovector                                     |
| pXMJ19                   | Shuttle vector for overexpression, Chl <sup>R</sup>                                                                   | Biovector                                     |
| pK18mobsacB-Δ6270        | A derivative of pK18mobsacB, harboring the fragment of GY20_RS16270 deletion                                          | This work                                     |
| pK18mobsacB-Δ785         | A derivative of pK18mobsacB, harboring the fragment of GY20_RS0100785 deletion                                        | This work                                     |
| pK18mobsacB-Δ530         | A derivative of pK18mobsacB, harboring the fragment of GY20_RS0110530 deletion                                        | This work                                     |
| pK18mobsacB-Δ270         | A derivative of pK18mobsacB, harboring the fragment of GY20_RS0110270 deletion                                        | This work                                     |
| pK18mobsacB-Δ525         | A derivative of pK18mobsacB, harboring the fragment of GY20_RS0110525 deletion                                        | This work                                     |
| pK18mobsacB-Δ790         | A derivative of pK18mobsacB, harboring the fragment of GY20_RS0100790 deletion                                        | This work                                     |
| pK18mobsacB-Δ535         | A derivative of pK18mobsacB, harboring the fragment of GY20_RS0110535 deletion                                        | This work                                     |
| pK18mobsacB-Δ550         | A derivative of pK18mobsacB, harboring the fragment of GY20_RS0110550 deletion                                        | This work                                     |
| pK18mobsacB-Δ545         | A derivative of pK18mobsacB, harboring the fragment of GY20_RS0110545 deletion                                        | This work                                     |
| pXMJ19- <i>pgsA</i>      | A derivative of pXMJ19, harboring overlap fragment of <i>pgsA</i>                                                     | This work                                     |
| pXMJ19- <i>pgsA</i> -A   | A derivative of pXMJ19, harboring overlap fragment of <i>pgsA</i> and GY20_RS0110270                                  | This work                                     |
| pXMJ19- <i>pgsA</i> -AB  | A derivative of pXMJ19, harboring overlap fragment of <i>pgsA</i> , GY20_RS0110270 and GY20_RS0100790                 | This work                                     |
| pXMJ19- <i>pgsA</i> -ABC | A derivative of pXMJ19, harboring overlap fragment of <i>pgsA</i> , GY20_RS0110270, GY20_RS0100790 and GY20_RS0110545 | This work                                     |
| Strains                  |                                                                                                                       |                                               |
| <i>E. coli</i> DH5α      | Clone host strain                                                                                                     | Invitrogen                                    |
| WT                       | <i>C. crenatum</i> AS 1.542 wild-type strain                                                                          | China center of industrial culture collection |
| ΔGY20_RS16270            | <i>C. crenatum</i> AS 1.542 with a deletion of GY20_RS16270                                                           | This work                                     |

---

|                         |                                                   |           |
|-------------------------|---------------------------------------------------|-----------|
| $\Delta$ GY20_RS0100785 | <i>C. crenatum</i> AS 1.542 with a deletion of    | This work |
|                         | GY20_RS0100785                                    |           |
| $\Delta$ GY20_RS0110530 | <i>C. crenatum</i> AS 1.542 with a deletion of    | This work |
|                         | GY20_RS0110530                                    |           |
| $\Delta$ GY20_RS0110270 | <i>C. crenatum</i> AS 1.542 with a deletion of    | This work |
|                         | GY20_RS0110270                                    |           |
| $\Delta$ GY20_RS0110525 | <i>C. crenatum</i> AS 1.542 with a deletion of    | This work |
|                         | GY20_RS0110525                                    |           |
| $\Delta$ GY20_RS0100790 | <i>C. crenatum</i> AS 1.542 with a deletion of    | This work |
|                         | GY20_RS0100790                                    |           |
| $\Delta$ GY20_RS0110535 | <i>C. crenatum</i> AS 1.542 with a deletion of    | This work |
|                         | GY20_RS0110535                                    |           |
| $\Delta$ GY20_RS0110550 | <i>C. crenatum</i> AS 1.542 with a deletion of    | This work |
|                         | GY20_RS0110550                                    |           |
| $\Delta$ GY20_RS0110545 | <i>C. crenatum</i> AS 1.542 with a deletion of    | This work |
|                         | GY20_RS0110545                                    |           |
| PgsA                    | <i>C. crenatum</i> AS 1.542 harboring plasmids of |           |
|                         | pXMJ19- <i>pgsA</i>                               |           |
| PgsA-A                  | <i>C. crenatum</i> AS 1.542 harboring plasmids of | This work |
|                         | pXMJ19- <i>pgsA</i> -A                            |           |
| PgsA-AB                 | <i>C. crenatum</i> AS 1.542 harboring plasmids of | This work |
|                         | pXMJ19- <i>pgsA</i> -AB                           |           |
| PgsA-ABC                | <i>C. crenatum</i> AS 1.542 harboring plasmids    | This work |
|                         | of pXMJ19- <i>pgsA</i> -ABC                       |           |

---

**Table S2.** Primers and sequences in this study.

| primers     | Primer sequences (5'-3')                          | Target                                |
|-------------|---------------------------------------------------|---------------------------------------|
| 6270-up-F   | gattacgaattcgagctcgggtacgaagcagtactttagg          | Upstream fragment of GY20_RS16270     |
| 6270 -up-R  | gtgttctccatgcttatgaaagtactttcctgtagtaagtgaatgag   | Upstream fragment of GY20_RS16270     |
| 6270-down-F | ctcattcacttactacaggaaagtactttcataagcatggagaacac   | Downstream fragment of GY20_RS16270   |
| 6270-down-R | ttttccagtcacgacgttggtatgcgcgcttctccatc            | Downstream fragment of GY20_RS16270   |
| 785-up-F    | gattacgaattcgagctcgggtatggctcagacacccgc           | Upstream fragment of GY20_RS0100785   |
| 785-up-R    | ctcatccatcgtggaggccagtacggcccactgcc               | Upstream fragment of GY20_RS0100785   |
| 785-down-F  | ggcagtgggcccgtactggcctccacgatggatgag              | Downstream fragment of GY20_RS0100785 |
| 785-down-R  | ttttccagtcacgacgttggtactgtgcgtccgtgacca           | Downstream fragment of GY20_RS0100785 |
| 530-up-F    | gattacgaattcgagctcgggtgaggtaggaggccaccatct        | Upstream fragment of GY20_RS0110530   |
| 530-up-R    | aggccatgggtagtcaggaatgtcaatctccttgatcgtggaag      | Upstream fragment of GY20_RS0110530   |
| 530-down-F  | cttaccacgatccaaggagattgacattcctgactacccatggcct    | Downstream fragment of GY20_RS0110530 |
| 530-down-R  | ttttccagtcacgacgttggtgctgaggcatcaggtcagg          | Downstream fragment of GY20_RS0110530 |
| 270-up-F    | gattacgaattcgagctcgggtaccaatgccataaacatctaaatgctg | Upstream fragment of GY20_RS0110270   |
| 270-up-R    | ggcaccggtttctagggtgattattggcccctttcttcaggt        | Upstream fragment of GY20_RS0110270   |
| 270-down-F  | acctgaaagaaagggccaataatcacctagaaaccggtgcc         | Downstream fragment of GY20_RS0110270 |
| 270-down-R  | ttttccagtcacgacgttggtggcgcccagcagat               | Downstream fragment of GY20_RS0110270 |
| 525-up-F    | gattacgaattcgagctcgggtatgacaagtagttttcccggc       | Upstream fragment of GY20_RS0110525   |
| 525-up-R    | tggtccactcgacgtcctgcaggttcaatggggtcctggg          | Upstream fragment of GY20_RS0110525   |
| 525-down-F  | cccaggacccattgaacctgcaggacgtcgagtggacca           | Downstream fragment of GY20_RS0110525 |

|                |                                                        |                                       |
|----------------|--------------------------------------------------------|---------------------------------------|
| 525-down-R     | ttttccagtcacgacgttgccatcgacaggtagatcgattcgg            | Downstream fragment of GY20_RS0110525 |
| 790-up-F       | gattacgaattcgagctcggtaaggaactgggactcacccc              | Upstream fragment of GY20_RS0100790   |
| 790-up-R       | cggagatctgcgtgaggatgtagttgctccttgctttgaatcctcg         | Upstream fragment of GY20_RS0100790   |
| 790-down-F     | cgaggattcaaagcaaggagcaactacatcctcacgcagatctccg         | Downstream fragment of GY20_RS0100790 |
| 790-down-R     | ttttccagtcacgacgttgccattttgagggtacggattcgg             | Downstream fragment of GY20_RS0100790 |
| 535-up-F       | gattacgaattcgagctcggtagcccgtagggcgag                   | Upstream fragment of GY20_RS0110535   |
| 535-up-R       | agatccagcaccacaacatcgagacccagtatcgcttcg                | Upstream fragment of GY20_RS0110535   |
| 535-down-F     | cgaagcgatactggggtctcgatgttggtgctggatct                 | Downstream fragment of GY20_RS0110535 |
| 535-down-R     | ttttccagtcacgacgttgatcatcgacgatcggttcacg               | Downstream fragment of GY20_RS0110535 |
| 550-up-F       | gattacgaattcgagctcggtagcactccccaccacc                  | Upstream fragment of GY20_RS0110550   |
| 550-up-R       | cgacgaccttctcgcccgccgtagaggaagatgatcg                  | Upstream fragment of GY20_RS0110550   |
| 550-down-F     | cgatcatcttctctacggcgggcccgaaggtcgtcg                   | Downstream fragment of GY20_RS0110550 |
| 550-down-R     | ttttccagtcacgacgttgatcgatcaggcggaaccagaaca             | Downstream fragment of GY20_RS0110550 |
| 545-up-F       | gattacgaattcgagctcggtagggggcggtccac                    | Upstream fragment of GY20_RS0110545   |
| 545-up-R       | gtcggggtcgagatgatggggccggggcgggaga                     | Upstream fragment of GY20_RS0110545   |
| 545-down-F     | tctccgccccggccccatcatctcgaccccgac                      | Downstream fragment of GY20_RS0110545 |
| 545-down-R     | ttttccagtcacgacgttgatgataaacgccaggtgatcgc              | Downstream fragment of GY20_RS0110545 |
| <i>pgsA</i> -F | attaattaagcttgcatgcctatgaaaaaagaactgagctttcat          | ORF of <i>pgsA</i>                    |
| <i>pgsA</i> -R | ctgaattcgagctcggtagccctatttagattttagttgtcact           | ORF of <i>pgsA</i>                    |
| 790-F          | agtgacaaactaaaatctaaaggcagcggtatgtccaacagcgaa<br>tgcca | ORF of<br>GY20_RS0100790              |
| 790-R          | ctgaattcgagctcggtagcccttaggccttactgaagcg               | ORF of<br>GY20_RS0100790              |

|          |                                                           |                                            |
|----------|-----------------------------------------------------------|--------------------------------------------|
| 545-F    | cgcttcagtaaggccggcagcgggtgtggccgcggaaccgacgc<br>a         | ORF of<br>GY20_RS0110545                   |
| 545-R    | ctgaattcgagctcgggtacccttaggacaagacgggtgtagccggt           | ORF of<br>GY20_RS0110545                   |
| 270-F    | accggctacaccgtcttgtccggcagcgggtatggctatcaagaact<br>acactg | ORF of<br>GY20_RS0110270                   |
| 270-R    | ctgaattcgagctcgggtacccttatgcaacaacctttagccagcc            | ORF of<br>GY20_RS0110270                   |
| 6270-Q-F | gcatgatgctgttgattgcg                                      | To detect the gene<br>expression levels of |
| 6270-Q-R | ttctagccaatgtcccagca                                      | To detect the gene<br>expression levels of |
| 785-Q-F  | caagggtcctcaaagttaccg                                     | To detect the gene<br>expression levels of |
| 785-Q-R  | cgatgacaacgggaacgaaa                                      | o detect the gene<br>expression levels of  |
| 530-Q-F  | cttctaccacagcctcacga                                      | To detect the gene<br>expression levels of |
| 530-Q-R  | tgctcatgatcaggacctc                                       | To detect the gene<br>expression levels of |
| 270-Q-F  | tggacgtcacctagaaacc                                       | To detect the gene<br>expression levels of |
| 270-Q-R  | aacaacctttagccagcct                                       | To detect the gene<br>expression levels of |
| 525-Q-F  | ccaatgaactgctgagagc                                       | To detect the gene<br>expression levels of |
| 525-Q-R  | ccgggtgtgggaatggtagaa                                     | To detect the gene<br>expression levels of |
| 790-Q-F  | atcgacatcctcacgcagat                                      | To detect the gene<br>expression levels of |
| 790-Q-R  | cgaggtcagctgcttctttg                                      | To detect the gene<br>expression levels of |
| 535-Q-F  | caccttctcggactgtaca                                       | To detect the gene<br>expression levels of |
| 535-Q-R  | accagttcccggatgctaaa                                      | To detect the gene<br>expression levels of |
| 550-Q-F  | gtggctctagccagtgatga                                      | To detect the gene<br>expression levels of |
| 550-Q-R  | cagaccaggttctggacat                                       | To detect the gene<br>expression levels of |
| 545-Q-F  | gtctccatcgtcacggtca                                       | To detect the gene<br>expression levels of |

|         |                          |                                         |
|---------|--------------------------|-----------------------------------------|
| 545-Q-R | gtgtagccggtctctcaat      | To detect the gene expression levels of |
| 16S-Q-F | ctgctgcaagaccatccttc     | To detect the gene expression levels of |
| 16S-Q-R | tggtagcagggcaagtatt      | To detect the gene expression levels of |
| pXMJ19  | cggctcgataatgtgtgga      | Recombinant pXMJ19                      |
| check-F |                          | vector detecting                        |
| pXMJ19  | atcttctctcatccgcaaa      | Recombinant pXMJ19                      |
| check-R |                          | vector detecting                        |
| M13-F   | cgccagggttttccagtcacgac  | Recombinant                             |
|         |                          | pK18 <i>mobsacB</i> vector              |
| M13-R   | gaggggataacaatttcacacagg | Recombinant                             |
|         |                          | pK18 <i>mobsacB</i> vector              |

**Table S3.** The selected DEGs related energy metabolism.

| Gene_id        | Gene description                                          | Log2FC       |
|----------------|-----------------------------------------------------------|--------------|
| GY20_RS0101900 | succinate dehydrogenase iron-sulfur subunit, <i>sdhB</i>  | -1.536938671 |
| GY20_RS0101245 | succinate dehydrogenase cytochrome b subunit, <i>sdhC</i> | -1.493861784 |
|                | succinate dehydrogenase (quinone) flavoprotein            |              |
| GY20_RS0101250 | subunit, <i>sdhA</i>                                      | -1.43069148  |
| GY20_RS0107915 | aconitate hydratase, <i>acnA</i>                          | -1.249445956 |

**Table S4.** The selected DEGs related metal ion transport.

| Gene_id        | Gene description                                                               | Log2FC      |
|----------------|--------------------------------------------------------------------------------|-------------|
| GY20_RS0110535 | response regulator transcription factor, the homologue of <i>copR</i>          | 2.450084028 |
| GY20_RS0110270 | cation transporter, the homologue of <i>copZ</i>                               | 3.759152948 |
| GY20_RS0110525 | multicopper oxidase family protein, the homologue of <i>copO</i>               | 4.124230665 |
| GY20_RS0110530 | metal-binding protein, the homologue of <i>cueP</i>                            | 4.466062036 |
| GY20_RS0100790 | metal-sensitive transcriptional regulator, the homologue of <i>cosR</i>        | 5.009155814 |
| GY20_RS16270   | heavy metal translocating P-type ATPase, the homologue of <i>copB</i>          | 5.231444696 |
| GY20_RS0110550 | copper-translocating P-type ATPase, the homologue of <i>copB</i>               | 5.578069165 |
| GY20_RS0110545 | heavy-metal-associated domain-containing protein, the homologue of <i>copZ</i> | 6.224351036 |
| GY20_RS0100785 | heavy metal translocating P-type ATPase, the homologue of <i>copA</i>          | 6.484716556 |

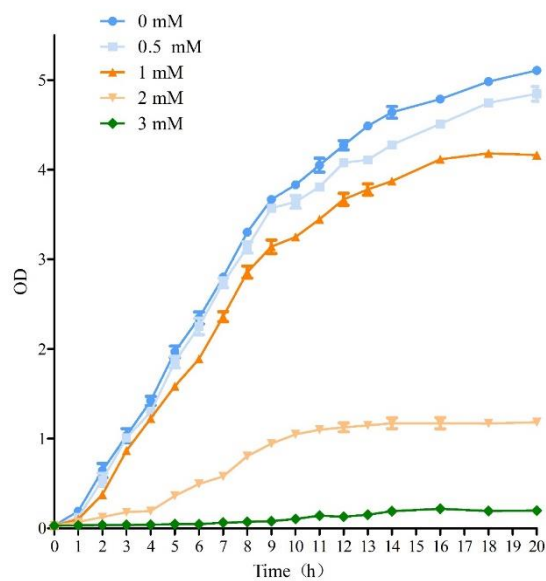

**Figure S1.** Growth of *C. crenatum* under different concentrations of copper.

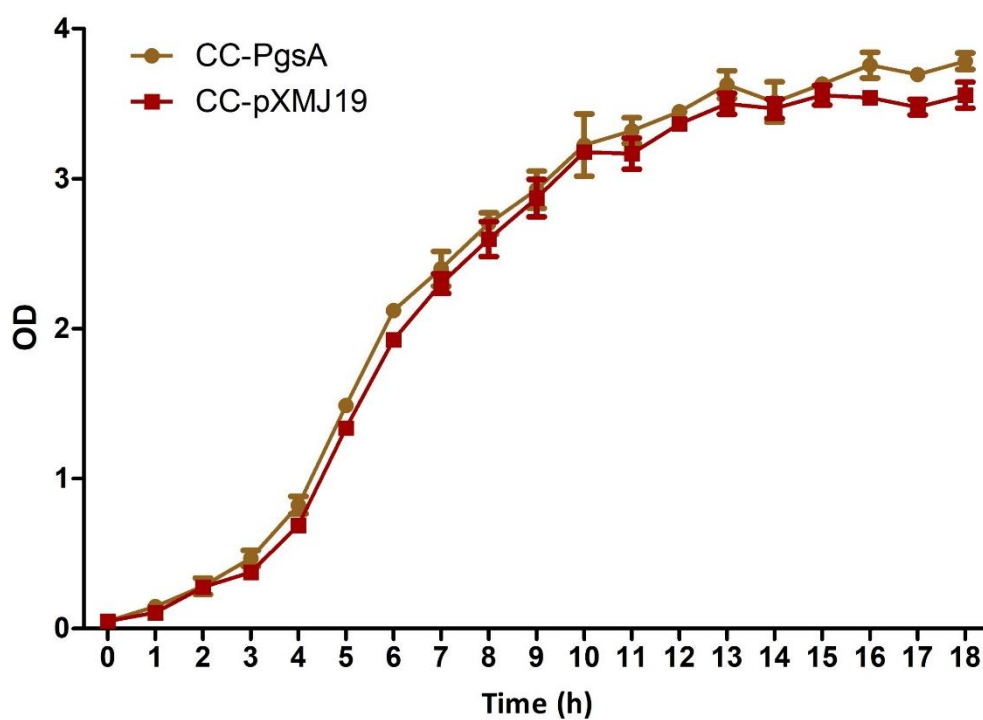

**Figure S2.** Growth of the strain harboring empty vector (CC-pXMJ19) and the strain expressing pgsA (CC-PgsA) under 1 mM copper.
